1 **Division of labor, bet hedging, and the evolution of mixed biofilm investment strategies**

2

3 Nick Vallespir Lowery<sup>1\*</sup>, Luke McNally<sup>1,2</sup>, William C. Ratcliff<sup>3</sup> & Sam P. Brown<sup>1,2,3</sup>

4

5 1. Institute of Evolutionary Biology, School of Biological Sciences, University of

6 Edinburgh, Edinburgh EH9 3FL, UK

7 2. Centre for Immunity, Infection and Evolution, School of Biological Sciences,

8 University of Edinburgh, Edinburgh EH9 3FL, UK

9 3. School of Biology, Georgia Institute of Technology, Atlanta GA 30332, USA

10 \*Current address: META Center for Systems Biology, University of Oregon, Eugene OR

11 97403, USA

12

13 **Correspondence to: Nick Lowery ([nlowery@uoregon.edu](mailto:nlowery@uoregon.edu)) or Sam Brown**

14 **([sam.brown@biology.gatech.edu](mailto:sam.brown@biology.gatech.edu))**

15 **ABSTRACT**

16 Bacterial cells, like many other organisms, face a tradeoff between longevity and fecundity. Planktonic  
17 cells are fast growing and fragile, while biofilm cells are often slower growing but stress resistant. Here  
18 we ask: why do bacterial lineages invest simultaneously in both fast and slow growing types? We  
19 develop a population dynamical model of lineage expansion across a patchy environment, and find that  
20 mixed investment is favored across a broad range of environmental conditions, even when transmission  
21 is entirely via biofilm cells. This mixed strategy is favored because of a division of labor, where  
22 exponentially dividing planktonic cells can act as an engine for the production of future biofilm cells,  
23 which grow more slowly. We use experimental evolution to test our predictions, and show that  
24 phenotypic heterogeneity is persistent even under selection for purely planktonic or purely biofilm  
25 transmission. Furthermore, simulations suggest that maintenance of a biofilm subpopulation serves as a  
26 cost-effective hedge against environmental uncertainty, which is also consistent with our experimental  
27 findings.

28 **INTRODUCTION**

29 After billions of years of evolution, many organisms retain an impressive capacity for innovation and  
30 adaptation to their environment. However, core traits such as durability and reproductive rate are often  
31 optimized such that improvements in one will often come at the cost of another - indeed, understanding  
32 how adaptation occurs when key fitness parameters are constrained by tradeoffs lies at the core of life  
33 history theory (1). While most life history theory has been developed with large multicellular organisms  
34 in mind, microbes also exhibit classical trade-offs in fecundity and longevity, with faster growing lineages  
35 tending to be more fragile (2, 3). Understanding how microbes manage such trade-offs remains a major  
36 goal in microbiology, both from mechanistic (4) and ecological (5) perspectives.

37 Multiple mechanisms of enhancing durability and longevity are available to microbes, but typically come  
38 at the cost of reduced metabolic proficiency. Spore formation is perhaps the clearest example of a high  
39 survival, low fecundity phenotype: by encasing the genome and some essential metabolic machinery in  
40 a thick and extremely resistant cell wall, dormant spores can survive for extraordinarily long durations  
41 (6, 7). Alternatively, cells may form metabolically dormant persister cells capable of surviving diverse  
42 environmental insults (8, 9). Finally, many microbial species form biofilms, where dense cell packing and  
43 production of a protective extracellular matrix provides broad resistance to stressors such as  
44 desiccation, predation, or chemical insult (10), but also limits space and nutrient diffusion, thereby  
45 reducing growth rates.

46 Clonally reproducing microbes present an interesting and experimentally tractable system to examine  
47 mixed-behavioral strategies. Across many species of microbe, single genotypes can produce coexisting  
48 subpopulations of rapidly dividing planktonic cells and slow-growing or dormant stress-tolerant  
49 phenotypes, but focus is often given to a specific phenotype of interest rather than the balance between  
50 alternate phenotypes. In this study, we examine how the trade-off between survival and growth of  
51 individual cells drives the evolution of mixed biofilm / planktonic investments on a lineage scale under  
52 diverse environmental conditions. Specifically, we build population dynamical models of bacteria in  
53 patchy environments, where cells can switch between biofilm and planktonic states within ephemeral  
54 patches (via planktonic colonization of the biofilm, and dispersal from the biofilm to the planktonic  
55 state), and can also transmit among patches either as biofilm or planktonic cells. We then ask, under  
56 what conditions is investment into biofilm favored, given that biofilms grow more slowly? If only one  
57 phenotype (i.e. biofilm or plankton) is favored for transmission to a new patch, does it ever pay to  
58 diversify into the cell type that is, from a transmission perspective, a ‘dead end’? Our model predicts  
59 that phenotypic diversification can pay across a range of environmental conditions, as rapidly growing  
60 planktonic cells can function as a ‘growth engine’ providing higher levels of future planktonic and biofilm

61 cells for transmission. We then test our model predictions using stochastic simulations and experimental  
62 evolution of biofilm allocation in the environmental microbe *Pseudomonas aeruginosa*.

## 63 **RESULTS**

### 64 **Biofilm Growth Dynamics**

65 While it is well known that planktonic cells accumulate exponentially in nutrient-rich environments, it is  
66 less clear whether close-packed biofilm cells would follow the same functional form (note that here we  
67 are considering biofilm growth in the absence of any coupling with the planktonic compartment, i.e. no  
68 cells dispersing from the biofilm or colonizing from the bulk). We hypothesize that sparse colonization  
69 allows for lineages to grow exponentially, as there is little steric inhibition or nutrient depletion to slow  
70 growth. However, once confluence across the surface is reached, further growth is restricted to a fixed  
71 depth within the outermost layer in biofilms due to space and diffusion limitations (11, 12). We explore  
72 this conjecture using the individual-based simulation platform iDynoMiCS (13) to simulate a simple two-  
73 dimensional biofilm, and find that after an initial period of exponential growth, cell accumulation decays  
74 to a linear function in time (Figure 1). More generally, we find that the rate of biofilm growth depends  
75 on the geometry of the system being considered (Supplemental Text 1), with the growth rate following a  
76 polynomial of order equal to the dimensionality of the system (i.e. for a three dimensional sphere,  
77 biofilm cells accumulate as a cubic in time). However, it should be noted that for finite volumes there is  
78 a constant downward pressure through time on the order of the growth polynomial as the biofilm  
79 reaches confluence across each dimension (e.g., initially cubic expansion in three dimensions will decay  
80 to quadratic expansion in two dimensions once the limit in the z-direction is reached). These findings  
81 highlight that while biofilm cells do not face the extreme growth penalty of resistant spores or persister  
82 cells, they face a significant and compounding growth deficit in comparison with the exponential growth  
83 of planktonic populations.

## 84 **Coupled Biofilm-Plankton Dynamics**

85 We next model a growing bacterial microcosm within which cells grow in one of two compartments, the  
86 planktonic (P) phase within the bulk fluid, and the biofilm (B) phase attached to a surface and in contact  
87 with the bulk. The compartments are coupled, such that biofilm cells can disperse to the planktonic  
88 phase, and planktonic cells can colonize the biofilm. Cells in each compartment also divide, with  
89 planktonic cells growing exponentially, and biofilm cells growing linearly (i.e. we assume a finite 2-D  
90 surface available for biofilm colonization, and ignore the initial super-linear growth period).

91 With the biofilm limited to linear expansion, we reasoned that the effects of growth within and dispersal  
92 from the biofilm would be negligible when coupled to exponential growth in the planktonic phase. This  
93 simplification was shown to be reasonable by comparing numerical simulations of the full model and a  
94 simplified model with no biofilm growth or dispersal (Figure S1), yielding the model system outlined in  
95 Figure 2A, and Equations 1.1, 1.2, 2.1 and 2.2 for within-patch growth. By setting the growth of the  
96 biofilm to zero, this simplified framework renders biofilm cells functionally equivalent to spores or  
97 persisters as described above, i.e. a subpopulation of non-dividing cells supported by the growth of  
98 vegetative cells, which presumably must provide some other benefit (e.g. environmental resistance) to  
99 the overall population to counteract this loss in fitness or else be lost from the population.

100 Our simplified model framework results in the following coupled differential equations:

101 1.1) 
$$\frac{dP}{dt} = (r - c)P$$

102 1.2) 
$$\frac{dB}{dt} = cP$$

103 where  $r$  is the exponential growth rate,  $c$  is the rate of colonization of the biofilm (with  $0 \leq c < r$ ). Note  
104 that in general  $c$  need not be bounded by  $r$ , and arbitrarily high values for  $c$  would result in a decline in  $P$

105 as switching to the biofilm phase outpaces planktonic growth, giving a sharp trade-off between the two  
106 compartments; we discuss this case in the context in which it arises below. Solving equations 1.1 and  
107 1.2 as a function of time yields our within-patch population model,

108 2.1)  $P(t) = P_0 e^{(r-c)t}$

109 2.2)  $B(t) = \frac{c}{r-c} (P(t) - P_0)$

110 where  $P_0$  is the planktonic inoculum.

111 The within-patch model reveals a temporal trade-off in biofilm accumulation with increasing  
112 colonization (Figure 2). As expected, planktonic cells decline monotonically with increasing colonization  
113 rate  $c$ , as more cells are siphoned from the planktonic to the biofilm compartment (Figure 2, A and C).

114 The biofilm, however, shows more interesting dynamics with changing rates of colonization (Figure 2, B  
115 and D). At  $c = 0$ , no biofilm cells accumulate, and as  $c$  approaches  $r$ , all new planktonic cells colonize the  
116 biofilm, resulting in a static planktonic population and linear accumulation of biofilm cells (Figure 2 A  
117 and B, yellow lines). However, when the planktonic fraction is allowed to expand exponentially (with  $0 <$   
118  $c < r$ ), the biofilm also accumulates cells roughly exponentially (once  $P(t) \gg P_0$ ) at a constant fraction  $\frac{c}{r-c}$   
119 of the planktonic population. High colonization rates thus provide more biofilm cells at short time  
120 scales, while lower colonization rates maximize biofilm over longer periods of growth (Figure 2B).

121 In Figure 2D, we find that the colonization rate maximizing biofilm cells declines with increasing  
122 planktonic growth rates, giving a humped shape in biofilm as a function of colonization rate. We can  
123 find an analytical condition for this relationship by examining the slope of  $B$  as a function of  $c$  as  $c$   
124 approaches  $r$  (Equation 2.3, see Supplemental Text 2 for derivation).

125 2.3)  $\lim_{c \rightarrow r} \left( \frac{dB}{dc} \right) = -\frac{1}{2} P_0 t (rt - 2)$

126 If the slope is negative, this would imply an interior maximum in  $B$  at some  $c < r$  (as biofilm cells  
127 necessarily increase as  $c$  increases from zero). We find that this limit is negative for  $rt > 2$ , i.e. the  
128 presence of a humped relationship in  $B$  requires patch quality (the product  $rt$ ) to exceed a minimal  
129 threshold value.

130 These results suggest that the colonization rate maximizing biofilm will depend on opportunities for  
131 growth in the planktonic state (governed by growth rate  $r$  and growth duration  $t$ ), which we explore  
132 further in Figure 2E and F. In Figure 2E, plotting biofilm cells against planktonic cells reveals that while  
133 limited growth (blue lines) leads to an allocation trade-off (i.e. increasing  $B$  necessarily comes at the cost  
134 of decreasing  $P$ ), increasing growth rate decouples this trade-off, with  $B$  maximized at diminishing  
135 colonization rates  $c$ , depicted explicitly in Figure 2F. However, as colonization decreases beyond this  
136 point, biofilm declines sharply as colonization tends to zero.

137 Under high growth regimes, the planktonic fraction may therefore be viewed as a ‘growth engine’ to  
138 maximize biofilm: when within-patch conditions are sufficiently favorable to planktonic division  
139 (Equation 2.3), reducing the biofilm colonization rate  $c$  below the maximum increases the net flux of  
140 cells into the biofilm by expanding the pool of dividing planktonic cells,  $P$ . This growth engine effect is  
141 sufficient to drive colonization rates maximizing biofilm down to a fraction of the growth rate (Figure  
142 2F).

### 143 **Evolutionary Model**

144 While intermediate colonization rates may maximize biofilm, we note that any allocation towards the  
145 biofilm comes at the cost total population size in Equation 2.4:

$$146 \quad 2.4) \quad \frac{d(P(t) + B(t))}{dc} = -\frac{rP_0(1 + ((r - c)t - 1)e^{(r-c)t})}{(r - c)^2}$$

147 which is strictly negative for  $t > 0$  and equal to 0 at  $t = 0$ . Given this trade-off between the biofilm and  
148 total population size, what conditions would favor biofilm investment ( $c > 0$ )? We can examine the  
149 evolutionary consequences of allocation in the within-patch population model by constructing a life  
150 cycle in which a population colonizes successive patches through space and/or time (i.e. migration  
151 between patches, or remaining in a single patch that experiences periodic disturbances). We define a  
152 fitness function (Equations 3.1 and 3.2) by assigning transmission probabilities  $k_p$  and  $k_b$  that a given cell  
153 from the respective planktonic or biofilm compartments will go on to found a new patch:

154 3.1)  $W = k_p P(t) + k_b B(t),$

155 or, explicitly, per-founding cell (analogous to the reproductive number 'R0' framework common to  
156 parasite epidemiology and evolution, e.g. in (Frank, 1996))

157 3.2)  $W(c, r, t) = k_p e^{(r-c)t} + k_b (e^{(r-c)t} - 1) \frac{c}{r - c}$

158 Equation 3.2 allows us to interrogate the fitness consequences of biofilm investment strategies  
159 (colonization rate  $c$ ) across a wide array of ecological parameters.  $k_p$  and  $k_b$  capture the reproductive  
160 value of each cell type, and can be interpreted equivalently as a per-cell transmission probability or as  
161 the fraction of each subpopulation able to transmit successfully; they will dictate how well a given cell  
162 type (biofilm or planktonic) can survive the inter-patch transition, and be influenced by the nature of the  
163 environment. Growth time  $t$  describes the disturbance regime, i.e. how long a population can stay in a  
164 single patch, and  $r$  measures the nutrient quality of individual patches, or how rapidly planktonic cells  
165 can divide within the patch. We define  $c^*$  as the optimal colonization rate maximizing fitness  $W$  under a  
166 given ecological condition, and display the behavior of  $c^*$  as a function of transmission parameters  $k_p$   
167 and  $k_b$  in Figure 3.



168 There are three general strategies microbes may adopt in maximizing fitness: devoting all resources to  
169 the biofilm fraction ( $c^* = r$ , below black dotted lines in Figure 3), splitting resources between the two  
170 fractions ( $0 < c^* < r$ , between dotted lines in Figure 3), or devoting all resources to the plankton ( $c^* = 0$ ,  
171 above white dotted lines in Figure 3). In Supplemental Text 3, we investigate the conditions governing  
172 the two transitions defining these regimes by examining the behavior of Equation 3.2 in more detail.

### 173 *Trade-offs in allocation*

174 When growth opportunities are limited (Figure 3, upper left panel) we see evidence of a sharp tradeoff  
175 between  $B$  and  $P$  investment, with very little parameter space allowing intermediate investments ( $0 < c^*$   
176  $< r$ ). In the limit of zero within-patch growth, the allocation decision becomes a ‘zero-sum’ game, with  
177 no allowance for intermediate investment:

$$178 \quad 3.6) \quad \left. \frac{dW}{dc} \right|_{r=0} = te^{-ct}(k_b - k_p)$$

179 In this no growth scenario ( $r = 0$ ), if biofilm cells have greater transmission value ( $k_b > k_p$ ), then total  
180 biofilm investment is favored; if not, then total planktonic cell investment is favored, giving a strict  
181 trade-off defined by whichever fraction is preferentially transmitted between patches.

182 This simple zero-sum logic is intuitive, but fails significantly under more permissive growth conditions  
183 (i.e. increasing  $r$  and/or  $t$ ; Figure 3 and Figure S2), where we see an intermediate level of colonization is  
184 favored over a relatively large portion of the parameter space. Despite large transmission advantages to  
185 biofilm cells, the intermediate colonization regime extends to the boundary of  $k_p = 0$  (black dashed line  
186 undefined for  $r > 0.04$ , Figure 3), such that even when planktonic cells have zero probability of founding  
187 a new patch, the vast majority of the population is still allocated to that fraction. This result follows  
188 from the dynamics of the within-patch model (Equations 2.1, 2.2 and Figure 2): when  $k_p = 0$ , fitness is

189 determined entirely by the size of the biofilm population, which is maximized at low colonization rates  
190 under conditions favoring growth due to the driving force of the planktonic growth engine.

### 191 **Biofilm as a bet hedge against environmental instability**

192 In our evolutionary model (Figure 3), we assume that lineages can adapt their allocation decision making  
193 ( $c^*$ ) in the context of constant transmission weightings  $k_p$  and  $k_b$ . However, the relative success of  
194 biofilm vs. planktonic cell propagules is likely to vary extensively in time as a function of unpredictable  
195 biotic and abiotic stresses (i.e. changing  $k_p$  relative to  $k_b$ ). Despite reduced colonization rates leading to  
196 larger planktonic populations, sharply diminishing returns from further decreases in  $c$  (Figure 2E) suggest  
197 that the biofilm compartment has the potential to function as a cost-effective hedge against  
198 unpredictable selective events. At all growth rates, populations can exchange a small reduction in the  
199 size of the planktonic population for a massive increase in the biofilm population by raising the rate of  
200 colonization from a minimal value: returning to Equations 1.1 and 1.2, taking the ratio of the biofilm to  
201 planktonic growth rate yields the fraction  $\frac{c}{r-c}$ , which approaches infinity as  $c$  approaches  $r$ .

202 Maintaining a small biofilm presence is therefore relatively low-cost, even in the absence of  
203 environmental stresses that favor biofilm cells, suggesting that selection against low rates of biofilm  
204 production will be weak. To test this hypothesis, we performed a selection experiment, transferring 12  
205 replicate populations of *P. aeruginosa* for 20 transfers (approximately 100 generations), allowing only  
206 planktonic or only biofilm cells to survive (Figure 4). While relative biofilm production rapidly decreased  
207 in the plankton passaged lines ( $k_b = 0$ ,  $k_p = 1$ , red points in Figure 4A), declining from ~40% to ~13% of  
208 cells in biofilms after seven transfers (paired t-test, mean difference = 0.265,  $t = 18.7$ ,  $df = 11$ ,  $p = 1.1 \times 10^{-9}$ ),  
209 biofilm production did not evolve to be any lower over the remaining 13 transfers of the experiment  
210 (Figure 4A, fraction biofilm from passages 7-20 best fit by an intercept model [AIC = -580] vs. a linear

211 model [AIC = -424]; also note in Figure 4C the biofilm OD holds roughly constant over the course of the  
212 experiment).

213 Interestingly, in the biofilm-only selection line ( $k_b = 1$ ,  $k_p = 0$ ; Figure 4A, blue points), the proportion of  
214 cells in biofilms did not increase over the course of the experiment, despite the total number of cells in  
215 the biofilm increasing by more than 100% (Figure 4B). Particularly, we see that the planktonic cell  
216 density increases steadily, while the biofilm fraction increases initially then stagnates after roughly 10  
217 passages (Figure 4B, Table S1). This result is consistent with our models above, with planktonic growth  
218 driving biofilm accumulation, and experimentally demonstrates the utility of a mixed strategy under  
219 strict selection regimes.

220 The low cost of maintaining biofilm makes it well suited as a potential bet-hedging strategy, increasing  
221 the long-term geometric mean fitness in unpredictable environments by minimizing the variance in  
222 fitness through time. To test this prediction, we used our model framework to construct a simulated  
223 passaging regime in which growth and transmission parameters were subject to differing levels of  
224 variance. We assigned inoculum populations of planktonic cells a fixed colonization rate  $c$  (applied  
225 relative to  $r$ ), which were then subjected to alternating periods of growth and transmission. Parameters  
226  $r$ ,  $t$ ,  $k_p$  and  $k_b$  were drawn from normal distributions with fixed means  $\mu$ , and differing variances  $\sigma^2$   
227 between treatments. The values for  $r$ ,  $t$  and  $c$  were used to solve Equations 2.1 and 2.2; proportions  $k_p$   
228 and  $k_b$  of these new cells were then passaged to the next growth phase, as in Equation 3.1. The fitness  
229 function defined in equation 3.2 (effectively a reproductive number  $R_0$  (14)) was used as our fitness  
230 metric for these simulations, calculated as the ratio of founding cells in a given passage relative to the  
231 number of founding cells in the previous passage. Simulation results are displayed in Figure 5.

232 For all treatments, the variance in  $R_0$  declines with increasing  $c$ , consistent with biofilm colonization  
233 functioning as a bet-hedging strategy for bacteria facing unpredictable selection (Figure 6A). For low

234 and medium degrees of unpredictability, the average  $R_0$  declines monotonically with increasing  $c$ ,  
235 reflecting the penalty imposed by environmental variance on fitness (Figure 6B). Interestingly, under  
236 the high variance treatment, a pronounced hump shape in average  $R_0$  appears (Table S2), indicating that  
237 under extremely unpredictable environments the trade-off between mean fitness and reduced variance  
238 in fitness breaks down and biofilm formation is generally beneficial (Figure 6B). The combination of  
239 direct fitness benefits and bet hedging effects lead to maxima in geometric mean  $R_0$  at intermediate  
240 colonization rates across all variance treatments (Figure 6C).

## 241 **DISCUSSION**

242 In this work, we constructed a simple deterministic model of allocation between coupled biofilm and  
243 planktonic compartments within a growing bacterial population. Within the biofilm, cell division limited  
244 by geometry and nutrient diffusion rendered its effects inconsequential to the dynamics of the  
245 population as a whole, relative to the exponentially expanding pool of planktonic cells. Under  
246 inhospitable conditions, in which the population experienced restricted growth and/or frequent  
247 disruption, trade-offs between the biofilm and the planktonic compartment forced lineages to specialize  
248 in whichever fraction was favored to transmit between patches. When conditions become more  
249 permissive, the lineage is able to leverage exponential planktonic growth to maintain robust populations  
250 in both compartments, and at a fraction of the cellular cost of direct biofilm allocation (i.e. at reduced  
251 colonization rates  $c$ ); in general, such cost saving measures are likely to be favored in any cooperative  
252 trait during periods of growth (15). Because maintenance of a biofilm comes at little cost under  
253 conditions favoring planktonic growth, biofilm is able to function as a robust and cost-effective hedge  
254 against unpredictable environmental change. Conversely, the planktonic fraction is a useful amplifier of  
255 biofilm cells even when biofilm is the transmissible propagule – this growth/transmission division of  
256 labor is more obvious for strictly non-growing phenotypes (e.g. spores), but the same logic holds for  
257 slow growth in biofilms as well.

258 We focus primarily on biofilm-planktonic cell populations as a model of survival-fecundity alternate  
259 states, and therefore use the language of colonization (of biofilms by planktonic cells) and dispersal  
260 (from the biofilm) to represent the switching processes between the two phenotypes. However, the  
261 model logic applies to other classes of resistant cells as well, such as persisters and spores. Indeed,  
262 there are instances where biofilm formation functions as a prerequisite or amplifying step in the  
263 formation of other types of resistant cells: persister cells are often enriched in biofilms (8, 16–19), and  
264 biofilm formation is a prerequisite step in fruiting body formation (the preferential site of sporulation) in  
265 *Bacillus subtilis* (20, 21); it would be interesting to investigate how investment would be optimized with  
266 multiple survival phenotypes available in both simultaneous and sequential contexts.

267 Given the costs inherent to cellular investment into a growth-limited state, one may expect lineages to  
268 evolve the ability to efficiently switch between biofilm and planktonic phenotypes, thereby optimizing  
269 fitness by reducing lag times and minimizing unnecessary mortality in the event of environmental  
270 disturbance, and indeed such systems appear to be abundant in nature (22–27). However, we note that  
271 environmental sensing in this case would not supplant the need to maintain some level of biofilm as a  
272 hedge (Figure 5, Figure 6), but rather to enhance the efficiency of such maintenance; in environments  
273 where catastrophic disturbances occur even at very low frequency, lineages that maintain biofilm  
274 regardless will still have better chances of survival. One would therefore predict biofilm to be  
275 completely lost in only the most constant environments (Figure 5).

276 Phenotypic regulation to further optimize allocation between biofilm and planktonic lifestyles would  
277 also help expedite the evolution of rudimentary life cycles at the population level, alternating between a  
278 growing ‘soma’ and dispersive ‘propagules’ with distinct demographics associated with each phase.  
279 Under the formalism presented here, either the biofilm or planktonic compartments alone, or some  
280 combination thereof, may serve as dispersing propagules. The historical archetype has generally held  
281 that the biofilm functions as the soma, with motile planktonic cells as dispersive propagules (28–30).

282 More recently Hammerschmidt et al. (31) found that alternating selection on dispersive and biofilm  
283 phenotypes in *Pseudomonas fluorescens* leads to the evolution of a lifestyle in which cooperative biofilm  
284 cells producing shared adhesive molecules form a pellicle that functions as the growing soma, and  
285 planktonic non-adhesive cheats are co-opted as dispersive propagules, thereby dividing labor between  
286 the two cellular fractions and increasing the overall fitness of the lineage. Our results indicate that the  
287 opposite cycle (biofilm cells as propagules, planktonic cells as soma) could also be viable, as the  
288 population can still reap the benefits of dividing labor between specialized cellular fractions. Indeed,  
289 where individual patches are permissive to growth, but transmission between patches is exceedingly  
290 harsh (e.g. wind- or animal-dispersal), dispersal via biofilm aggregates and growth within a planktonic  
291 ‘soma’ would offer the greatest advantage, as the ‘soma’ would accumulate biomass rapidly, and  
292 dispersal propagules would enjoy increased survival at little reproductive cost given the hostile  
293 transmission conditions. For example, biofilm formation and other survival phenotypes are likely  
294 important to successful transmission via fomites, upon which bacteria can remain viable for months  
295 (32). Dispersal in physically linked groups (i.e. budding dispersal, (33)) may also help maintain  
296 cooperative traits during dispersal, thereby potentially accelerating colonization when a new patch is  
297 reached. The biofilm ‘streamers’ observed by Drescher et al. (34) may be another example of this mode  
298 of transmission, where flow rates are such that the biofilm forms physical bridges to allow colonization  
299 of vacant surfaces in a topographically complex environment, as full detachment would prevent  
300 recolonization of adjacent surfaces due to extreme shear forces.

301 Taken together, our results highlight the evolutionary significance of within-population phenotypic  
302 heterogeneity and its consequences for survival and fecundity in mixed transmission environments. By  
303 optimizing the switching rate between robust and fecund specialists (here, the colonization rate from  
304 the planktonic to biofilm fractions, though we note that other mechanisms could lead to equivalent  
305 outcomes, such as the steady-state frequencies of genotypes arising from within-population

306 diversification, as in (35, 36)), lineages were able to maximize fitness and transmission across a wide  
307 range of environments, as well as enhance survival in the face of catastrophic changes within the  
308 environment. The rate of phenotypic switching is therefore an essential parameter upon which  
309 selection may act when multiple phenotypes can persist within lineages.

## 310 **METHODS**

### 311 *Passaging experiment*

312 A mid-exponential phase culture of *P. aeruginosa* PA01 was used to inoculate 200 uL LB and one 3 mm  
313 sterile glass bead in each of 24 wells in a 96 well plate at an OD of 0.05. Plates were sealed with  
314 Aeraseal tape and grown statically at 24 °C in a humidified chamber. Every 12 hours (growth conditions  
315 were chosen to prevent entry into stationary phase, where multiple regulatory systems that modulate  
316 biofilm and growth behaviors are engaged), biofilm allocation was measured by removing and  
317 measuring the OD of the liquid phase, then washing, resuspending and measuring the density of the  
318 attached biofilm as above in 200 uL fresh LB. 12 lines had only the planktonic cells passaged, while the  
319 other 12 had only biofilm cells passaged; in each case, cells were diluted to an inoculum OD of 0.05, and  
320 20 passages were performed.

### 321 *Statistics and mathematical analysis*

322 Agent based simulations were performed using iDynoMiCs (13), and analytical analyses were performed  
323 using Mathematica. Numerical modelling (37) and statistics were performed in R (38), unless otherwise  
324 noted.

325

## 326 **REFERENCES**

327 1. Stearns. 1992. The Evolution of Life Histories.

- 328 2. De Paepe M, Taddei F. 2006. Viruses' life history: towards a mechanistic basis of a trade-off  
329 between survival and reproduction among phages. *PLoS Biol* 4:e193.
- 330 3. Heineman RH, Brown SP. 2012. Experimental evolution of a bacteriophage virus reveals the  
331 trajectory of adaptation across a fecundity/longevity trade-off. *PLoS One* 7:e46322.
- 332 4. Gudelj I, Weitz JS, Ferenci T, Claire Horner-Devine M, Marx CJ, Meyer JR, Forde SE. 2010. An  
333 integrative approach to understanding microbial diversity: From intracellular mechanisms to  
334 community structure. *Ecol Lett* 13:1073–1084.
- 335 5. Green JL, Bohannan BJM, Whitaker RJ. 2008. Microbial biogeography: from taxonomy to traits.  
336 *Science* (80- ) 320:1039–1043.
- 337 6. Cano RJ, Borucki MK. 1995. Revival and identification of bacterial spores in 25- to 40-million-year-  
338 old Dominican amber. *Science* 268:1060–1064.
- 339 7. Vreeland RH, Rosenzweig WD, Powers DW. 2000. Isolation of a 250 million-year-old halotolerant  
340 bacterium from a primary salt crystal. *Nature* 407:897–900.
- 341 8. Lewis K. 2010. Persister Cells.
- 342 9. Wood TK, Knabel SJ, Kwan BW. 2013. Bacterial persister cell formation and dormancy. *Appl*  
343 *Environ Microbiol* 79:7116–21.
- 344 10. Van Acker H, Van Dijck P, Coenye T. 2014. Molecular mechanisms of antimicrobial tolerance and  
345 resistance in bacterial and fungal biofilms. *Trends Microbiol* 22:326–33.
- 346 11. Werner E, Roe F, Bugnicourt A, Michael J, Heydorn A, Molin S, Pitts B, Stewart PS, Franklin MJ.  
347 2004. Stratified Growth in *Pseudomonas aeruginosa* Biofilms Stratified Growth in *Pseudomonas*  
348 *aeruginosa* Biofilms 70:6188–6196.



- 349 12. Fux CA, Costerton JW, Stewart PS, Stoodley P. 2005. Survival strategies of infectious biofilms.  
350 Trends Microbiol 13:34–40.
- 351 13. Lardon L a, Merkey B V, Martins S, Dötsch A, Picioreanu C, Kreft J-U, Smets BF. 2011. iDynoMiCS:  
352 next-generation individual-based modelling of biofilms. Environ Microbiol 13:2416–34.
- 353 14. Frank SA. 1996. Models of parasite virulence. Q Rev Biol 71:37–78.
- 354 15. Cornforth DM, Sumpter DJT, Brown SP, Brännström Å. 2012. Synergy and group size in microbial  
355 cooperation. Am Nat 180:296–305.
- 356 16. Singh R, Ray P, Das A, Sharma M. 2009. Role of persisters and small-colony variants in antibiotic  
357 resistance of planktonic and biofilm-associated *Staphylococcus aureus*: an in vitro study. J Med  
358 Microbiol 58:1067–73.
- 359 17. Nadell CD, Xavier JB, Foster KR. 2009. The sociobiology of biofilms. FEMS Microbiol Rev 33:206–  
360 24.
- 361 18. Haaber J, Cohn MT, Frees D, Andersen TJ, Ingmer H. 2012. Planktonic aggregates of  
362 *Staphylococcus aureus* protect against common antibiotics. PLoS One 7:e41075.
- 363 19. Høiby N, Bjarnsholt T, Givskov M, Molin S, Ciofu O. 2010. Antibiotic resistance of bacterial  
364 biofilms. Int J Antimicrob Agents 35:322–32.
- 365 20. Branda SS, González-Pastor JE, Ben-Yehuda S, Losick R, Kolter R. 2001. Fruiting body formation by  
366 *Bacillus subtilis*. Proc Natl Acad Sci U S A 98:11621–6.
- 367 21. Aguilar C, Vlamakis H, Guzman A, Losick R, Kolter R. 2010. KinD is a checkpoint protein linking  
368 spore formation to extracellular matrix production in *Bacillus subtilis* biofilms. MBio 1:e00035-10.
- 369 22. Schuster M, Sexton DJ, Diggle SP, Greenberg EP. 2013. Acyl-Homoserine Lactone Quorum

- 370 Sensing: From Evolution to Application. *Annu Rev Microbiol* 43–63.
- 371 23. Cornforth DM, Popat R, McNally L, Gurney J, Scott-Phillips TC, Ivens A, Diggle SP, Brown SP. 2014.  
372 Combinatorial quorum sensing allows bacteria to resolve their social and physical environment.  
373 *Proc Natl Acad Sci U S A* 111:4280–4284.
- 374 24. Barraud N, Schleheck D, Klebensberger J, Webb JS, Hassett DJ, Rice S a, Kjelleberg S. 2009. Nitric  
375 oxide signaling in *Pseudomonas aeruginosa* biofilms mediates phosphodiesterase activity,  
376 decreased cyclic di-GMP levels, and enhanced dispersal. *J Bacteriol* 191:7333–42.
- 377 25. Huynh TT, McDougald D, Klebensberger J, Al Qarni B, Barraud N, Rice S a, Kjelleberg S, Schleheck  
378 D. 2012. Glucose starvation-induced dispersal of *Pseudomonas aeruginosa* biofilms is cAMP and  
379 energy dependent. *PLoS One* 7:e42874.
- 380 26. Dow JM, Crossman L, Findlay K, He Y-Q, Feng J-X, Tang J-L. 2003. Biofilm dispersal in  
381 *Xanthomonas campestris* is controlled by cell-cell signaling and is required for full virulence to  
382 plants. *Proc Natl Acad Sci U S A* 100:10995–11000.
- 383 27. Sauer K, Cullen MC, Rickard AH, Zeef LAH, Gilbert P, Davies DG. 2004. Characterization of  
384 Nutrient-Induced Dispersion in *Pseudomonas aeruginosa* PAO1 Biofilm. *J Bacteriol* 186:7312–  
385 7326.
- 386 28. O’Toole GA, Kaplan HB, Kolter R. 2000. Biofilm formation as microbial development. *Annu Rev*  
387 *Microbiol* 54:49–79.
- 388 29. Sauer K, Camper AK, Ehrlich GD, William J, Davies DG, Costerton JW. 2002. *Pseudomonas*  
389 *aeruginosa* Displays Multiple Phenotypes during Development as a Biofilm. *J Bacteriol* 184:1140–  
390 1154.
- 391 30. Monds RD, O’Toole G a. 2009. The developmental model of microbial biofilms: ten years of a

- 392 paradigm up for review. *Trends Microbiol* 17:73–87.
- 393 31. Hammerschmidt K, Rose CJ, Kerr B, Rainey PB. 2014. Life cycles, fitness decoupling and the  
394 evolution of multicellularity. *Nature* 515:75–79.
- 395 32. Kramer A, Schwebke I, Kampf G. 2006. How long do nosocomial pathogens persist on inanimate  
396 surfaces? A systematic review. *BMC Infect Dis* 6:130.
- 397 33. Kümmerli R, Gardner A, West SA, Griffin AS. 2009. Limited dispersal, budding dispersal, and  
398 cooperation: An experimental study. *Evolution (N Y)* 63:939–949.
- 399 34. Drescher K, Shen Y, Bassler BL, Stone H a. 2013. Biofilm streamers cause catastrophic disruption  
400 of flow with consequences for environmental and medical systems. *Proc Natl Acad Sci U S A*  
401 110:4345–50.
- 402 35. Poltak SR, Cooper VS. 2010. Ecological succession in long-term experimentally evolved biofilms  
403 produces synergistic communities. *ISME J* 5:369–78.
- 404 36. Kim W, Levy SB, Foster KR. 2016. Rapid radiation in bacteria leads to a division of labour. *Nat*  
405 *Commun* 7:10508.
- 406 37. Soetaert K, Petzoldt T, Setzer RW. 2010. Solving Differential Equations in R: Package deSolve. *J*  
407 *Stat Softw* 33:1–25.
- 408 38. R Core Team. 2015. R: A language and environment for statistical computing. R Foundation for  
409 Statistical Computing, Vienna, Austria.

410

411 **FUNDING STATEMENT**

412 NL was supported by a scholarship from the School of Biological Sciences, University of Edinburgh. LM  
413 was supported by Wellcome Trust grant #WT095831. WCR was supported by the Packard Foundation.  
414 LM and SPB were supported by HSFP grant #RGP0011/2014. The funders had no role in study design,  
415 data collection and interpretation, or the decision to submit the work for publication.

#### 416 **ACKNOWLEDGEMENTS**

417 We thank R. Parthasarathy, B. Bohannan, and members of the Brown laboratory for helpful comments.  
418 The authors declare no conflicts of interest.

#### 419 **FIGURE LEGENDS**

420 **Figure 1: Biofilms grow sub-exponentially.** **A**, accumulated cells and **B**, lineage growth rate through  
421 time for agent-based simulations of a 2-D biofilm growing on a 1-D surface. Varying inocula (see legend)  
422 were allowed to grow for a fixed time period under nutrient-rich conditions. Simulations were  
423 implemented using the agent-based simulation platform iDynoMiCS (13). **C**, Schematic depiction of  
424 nutrient depletion leading to growth arrest in the biofilm interior. Diffusion and active consumption of  
425 nutrients in the outermost layers of the biofilm (yellow cells) result in starvation conditions for cells in  
426 the interior regions (red cells).

427 **Figure 2: Maximal biofilm can be driven by planktonic growth.** **A**, time series of planktonic and **B**,  
428 biofilm cells, for colonization rates  $c$  between  $0.1r$  (purple) and  $0.99r$  (yellow), with  $r = 0.08$ ,  $P_0 =$   
429  $5,000,000$ . **C**, planktonic, and **D**, biofilm cells as a function of colonization rate relative to growth rate  
430 for  $t = 40$ ,  $0.02 \leq r \leq 0.12$  (blue-red color scale),  $P_0 = 5,000,000$ . **E**, Biofilm cells plotted against planktonic  
431 cells under the same conditions as C and D. The colonization rate varies over each curve, with the end  
432 points indicated by labels (relative colonization  $c/r$  approaches 1 at the left, and zero at the right).  
433 Diamonds indicate the maximum in biofilm cells. **F**, Relative colonization rate  $c/r$  at which biofilm is

434 maximized. Note in panels D and E the limit of  $c = 0$  is omitted, as this prevents any formation of biofilm  
435 cells.

436 **Figure 3: Optimal colonization rate  $c^*$  as a function of reproductive value for planktonic and biofilm**  
437 **cells.** Contour plots showing the relative colonization rate ( $c^*/r$ , yellow-purple color scale) optimizing  
438 fitness (Equation 3.2). Each panel displays  $c^*/r$  as a function of  $k_p$  and  $k_b$ . Across panels, the growth rate  
439  $r$  increases from  $r = 0.02$  to  $0.12$ , with  $t = 40$  in all cases; similar plots varying  $t$  are displayed in Figure S2.  
440 White dotted line indicates the threshold at which  $c^* > 0$ , and black dotted line indicates the threshold  
441 at which  $c^* < 1$  (see main text and Supplemental Text 3).

442 **Figure 4: Selection for planktonic transmission fails to purge biofilm from experimental populations.**  
443 *P. aeruginosa* (PAO1) was grown in 96-well plates containing a glass bead at room temperature, and  
444 every 12 hours populations were fractionated, measured, and passaged to a new well. **A**, Proportion  
445 biofilm (defined as the ratio of the biofilm optical density (OD) to the sum of the ODs of the two  
446 fractions), **B**, fractionated ODs of B-selected ( $k_b = 1$ ,  $k_p = 0$ ), and **C**, fractionated ODs of P-selected ( $k_b = 0$ ,  
447  $k_p = 1$ ) lines over the course of the passaging experiment. Points represent 12 independently evolving  
448 lineages per treatment, and curves from best-fit regression (adjusted  $R^2 = 0.92$ , Table S1). All ODs are  
449 reported corrected for the OD of blank medium.

450 **Figure 5: Biofilm production can act as a bet-hedging strategy.** Log-scale plots of **A**, variance in  $R_0$ , **B**,  
451 average  $R_0$ , and **C**, geometric mean of  $R_0$ , are plotted as a function of relative colonization rate (ratio of  
452  $c$  to the expected value for  $r$ , see below) for lineages subject to passaging simulations with different  
453 levels of environmental instability. 100 replicate inocula of 5000 planktonic cells with the same fixed  
454 colonization rates  $c \in [0, 0.2]$  were subjected to 10 passages. For all cases,  $\mu_r = 0.06$ ,  $\mu_t = 40$ ,  $\mu_{kp} = 0.1$   
455 and  $\mu_{kb} = 0.6$ . Under fixed conditions these parameters would favor  $c^* = 0.49$ . Variance treatments  
456 modified  $\sigma^2$  of the distributions from which  $r$ ,  $t$ ,  $k_p$  and  $k_b$  were drawn, with  $\sigma_{low}^2 = \mu/100$ ,  $\sigma_{mid}^2 = \mu/9$  and

457  $\sigma^2_{\text{high}} = \mu/2.75$ . Parameters were restricted to logical values, with  $0 \leq k_b, k_p \leq 1$ ,  $r > 0$ , and  $t \geq 1$ ; this  
458 thresholding did not change the overall mean of any parameter by more than  $\pm 3\%$ .  $R_0$  was calculated as  
459 the ratio of founding cells at a given passage relative to the founding cells of the previous passage.  
460 Points and error bars (offset to reduce overlap) represent means with 95% confidence intervals, and  
461 solid lines display best-fit regressions (Table S2).

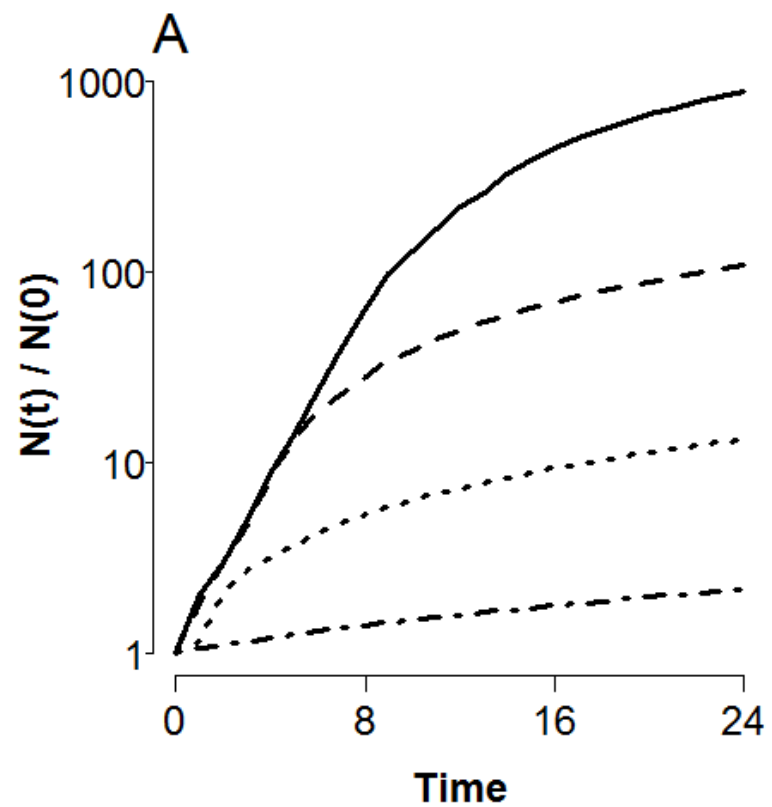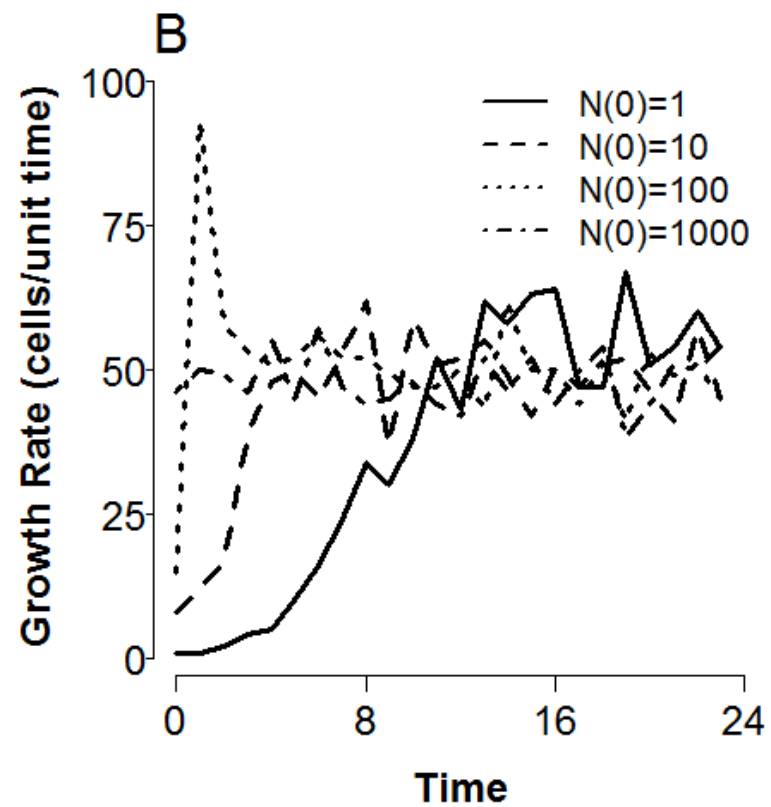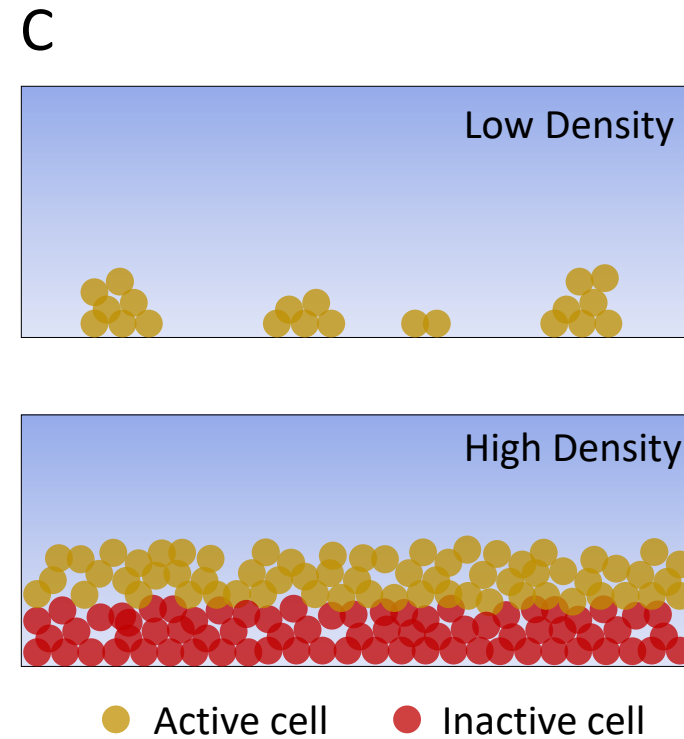

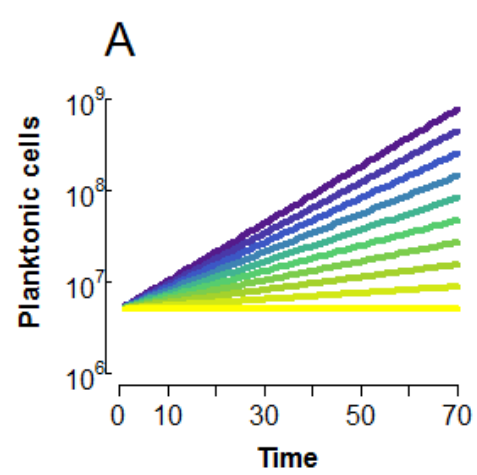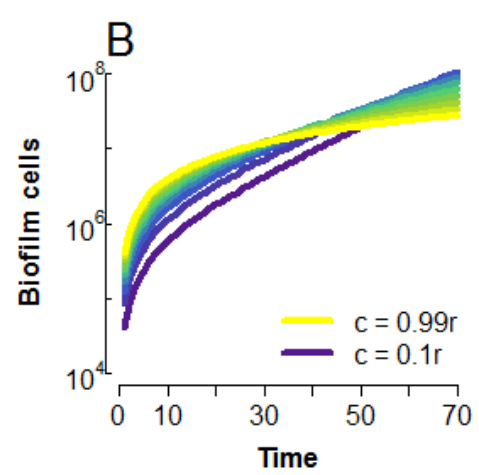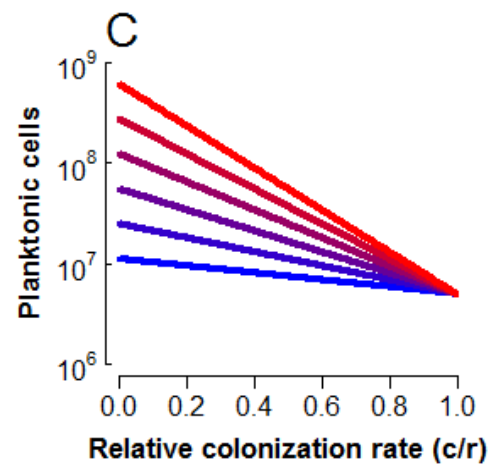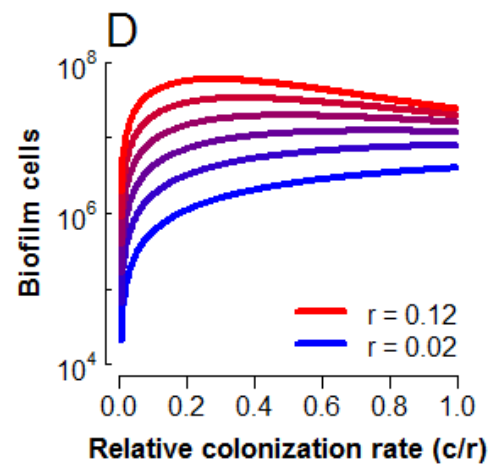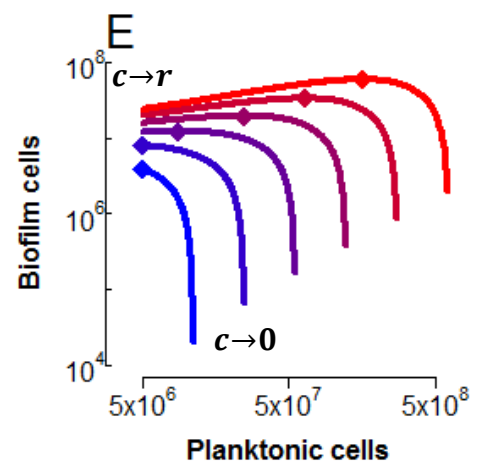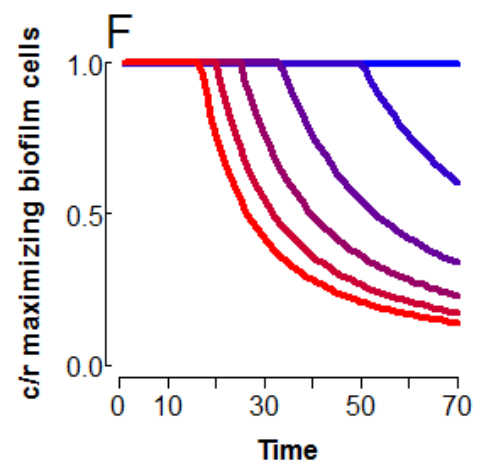



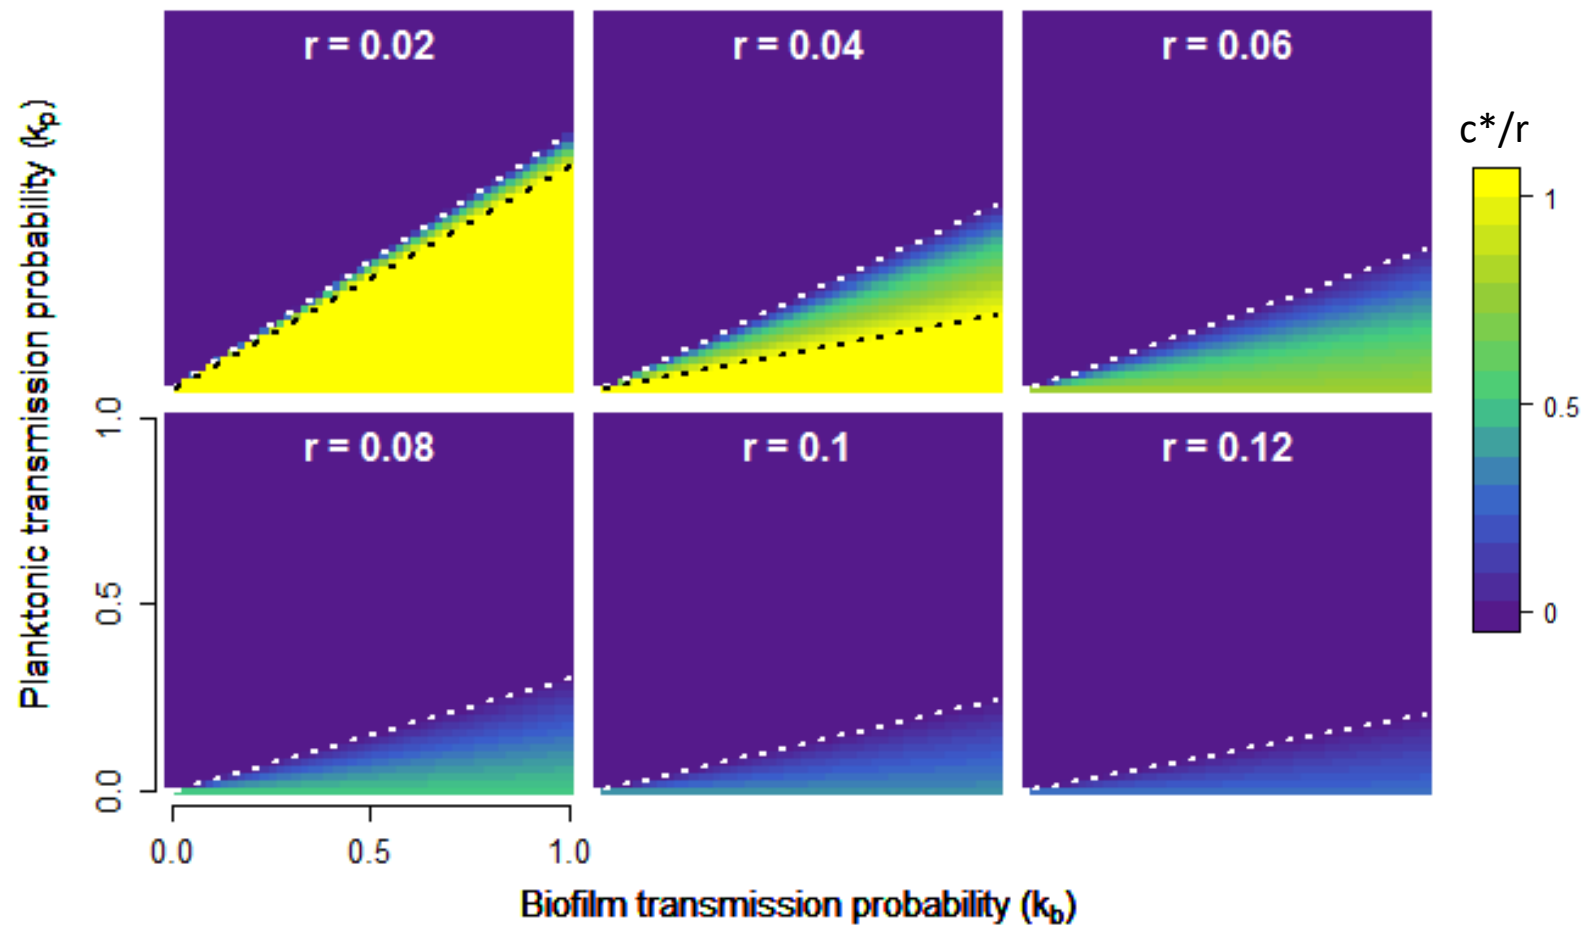

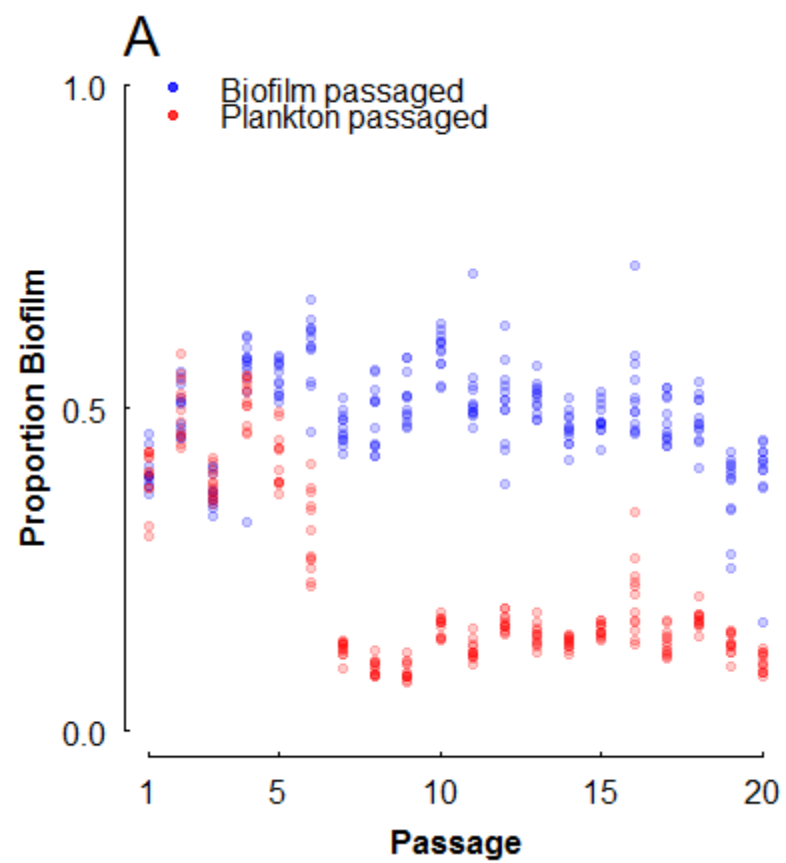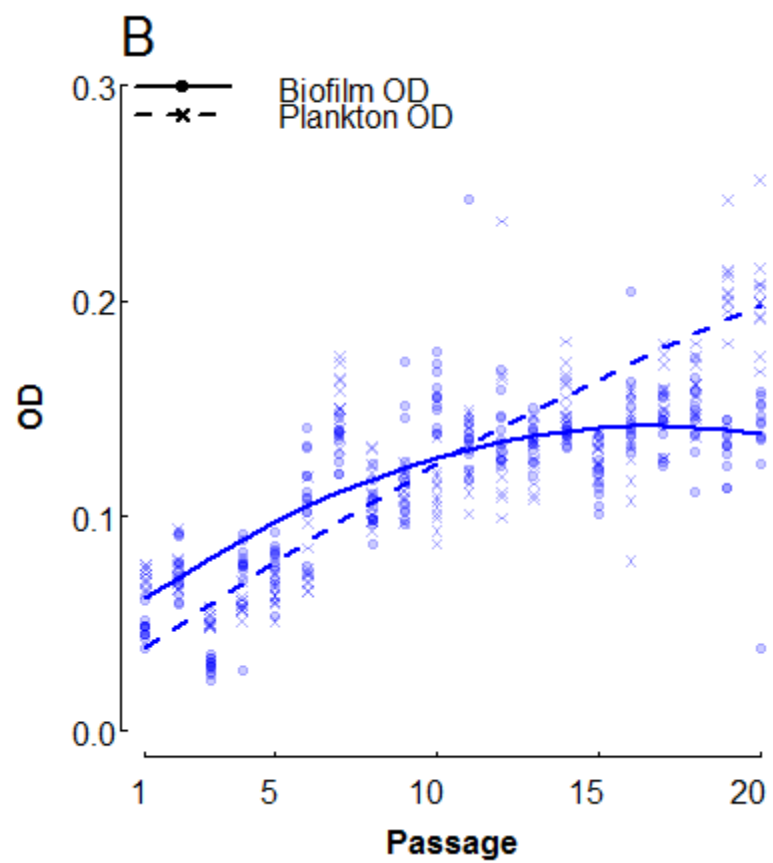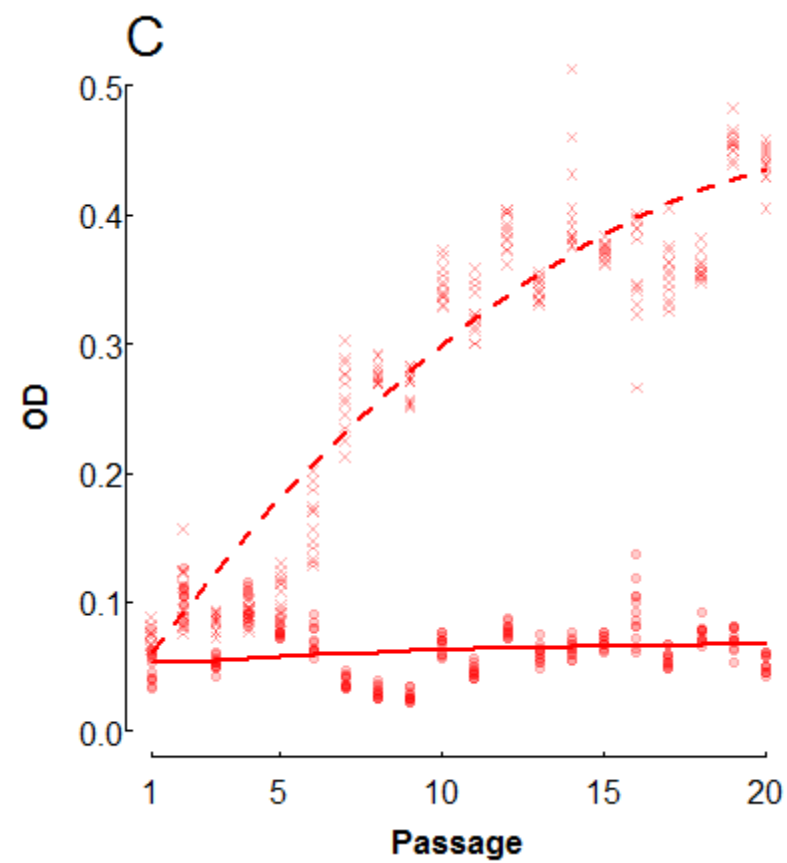

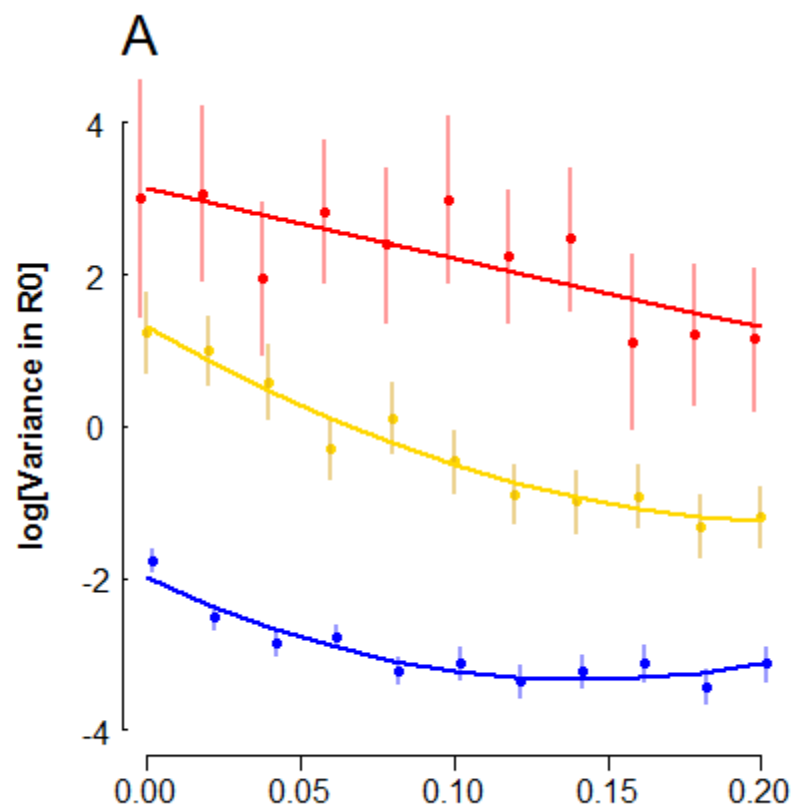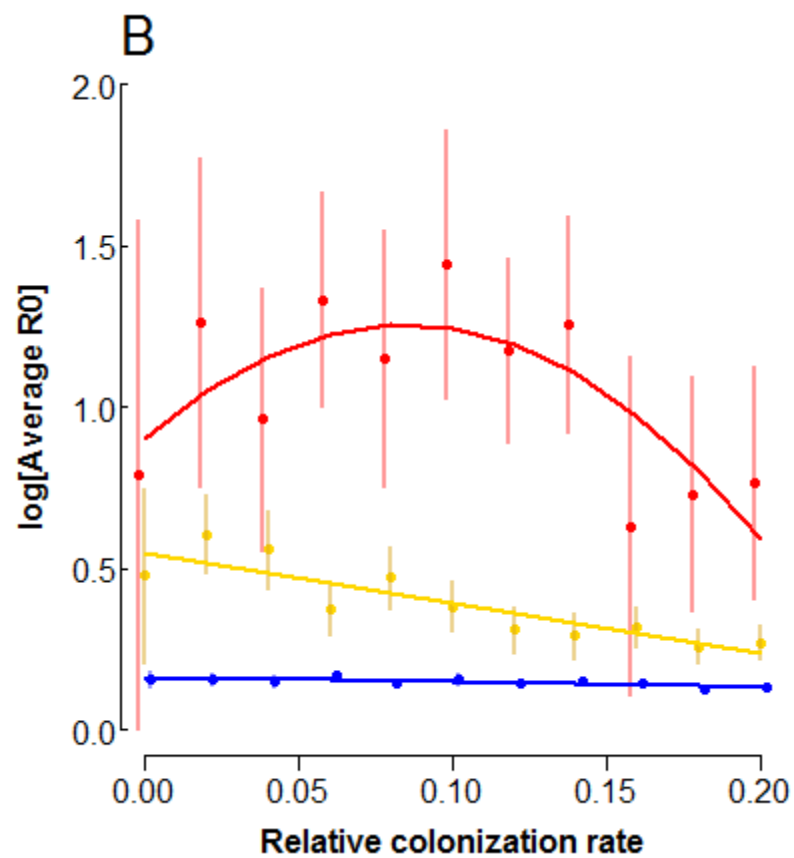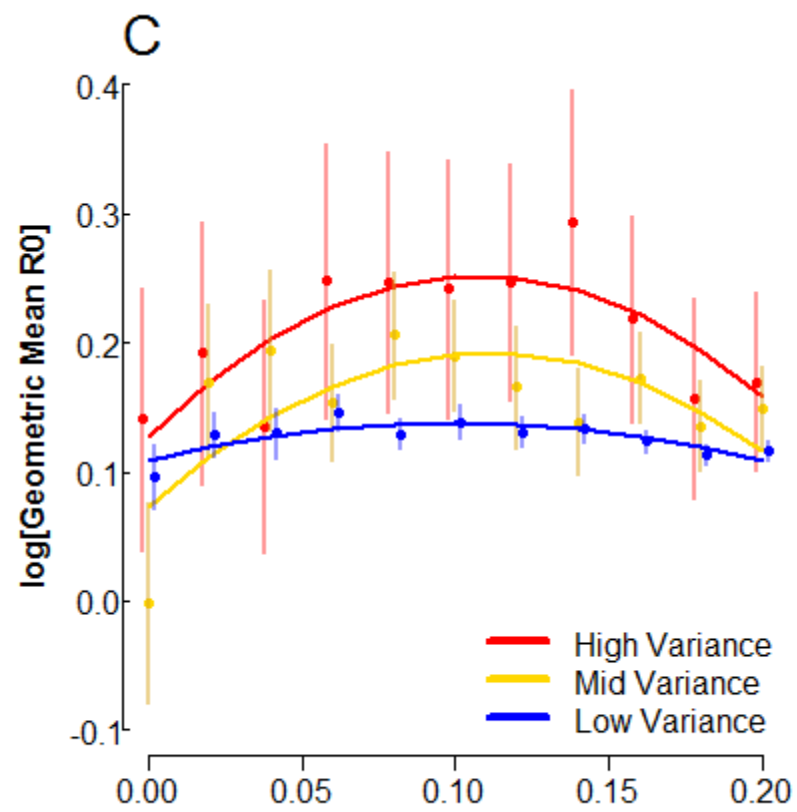

Source: http://biorxiv.org/content/10.1101/107102v1.full.pdf
